# Supplementary material for: Spotting-based differentiation of functional dopaminergic progenitors from human pluripotent stem cells
Source: Springer Nature journal article supplement (doi:10.1038/s41596-021-00673-4), 2022-02-09
Supplement: MOESM1 [file 41596_2021_673_MOESM1_ESM14.pdf]

## Supplementary information

---

# Spotting-based differentiation of functional dopaminergic progenitors from human pluripotent stem cells

---

In the format provided by the authors and unedited

**Supplementary Table 1. Total counts of harvested cells on day 15 suggesting that the spotting technique showed better viability than 2D monolayer culture method in 2 hESC lines (H9 and H7) and 2 hiPSC lines (C4 and N3)**

| Cell Type | 5K         |            |            |            | 10K        |            |            |             | 20K         |            |             |             | 730 K        |
|-----------|------------|------------|------------|------------|------------|------------|------------|-------------|-------------|------------|-------------|-------------|--------------|
|           | 4          | 6          | 9          | 12         | 4          | 6          | 9          | 12          | 4           | 6          | 9           | 12          | Monolayer    |
| <b>C4</b> | 1217K±174K | 3400K±87K  | 7183K±509K | 8267K±328K | 3968K±610K | 5817K±685K | 7717K±517K | 7400K±690K  | 3800K±548K  | 6733K±524K | 7733K±599K  | 7883K±825K  | 9950K±257K   |
| <b>N3</b> | 3200K±208K | 3967K±88K  | 6633K±219K | 6967K±869K | 4167K±590K | 4733K±441K | 6567K±867K | 9967K±1646K | 6233K±921K  | 7599K±644K | 9533K±2270K | 9400K±808K  | 18267K±623K  |
| <b>H9</b> | 2387K±875K | 3963K±701K | 5138K±800K | 6788K±517K | 5775K±382K | 7550K±278K | 8500K±436K | 9013K±618K  | 5025K±325K  | 7388K±508K | 9525K±784K  | 10438K±643K | 22692K±4158K |
| <b>H7</b> | 3675K±907K | 3775K±455K | 4925K±390K | 5325K±652K | 3800K±642K | 4700K±280K | 6975K±477K | 6775K±455K  | 5325K±1200K | 6150K±539K | 7650K±301K  | 8100K±274K  | 15100K±1411K |

**Supplementary Table 2. Cell loss at days 12 and 14 showing that the spotting technique results in much less cell loss compared to the conventional 2D monolayer culture method when tested using 2 hESC lines (H9 and H7) and 2 hiPSC lines (C4 and N3)**

| Cell Type | 5K         |           |            |            | 10K        |            |            |            | 20K        |            |            |            | 730 K       |
|-----------|------------|-----------|------------|------------|------------|------------|------------|------------|------------|------------|------------|------------|-------------|
|           | 4          | 6         | 9          | 12         | 4          | 6          | 9          | 12         | 4          | 6          | 9          | 12         | Monolayer   |
| <b>C4</b> | NA         | NA        | NA         | NA         | 874K±54K   | 1286K±102K | 1496K±169K | 1676K±134K | 1549K±379K | 1399K±228K | 1418K±144K | 1459K±230K | 6983K±554K  |
| <b>N3</b> | 1035K±143K | 805K±120K | 1020K±135K | 1375K±157K | 725K±70K   | 960K±30K   | 2070K±68K  | 2180K±180K | 1160K±97K  | 1335K±238K | 1795K±75K  | 2295K±53K  | 10025K±424K |
| <b>H9</b> | NA         | NA        | NA         | NA         | NA         | NA         | NA         | NA         | NA         | NA         | NA         | NA         | NA          |
| <b>H7</b> | 896K±84K   | 994K±206K | 1560K±176K | 3364K±391K | 1511K±227K | 1481K±292K | 2261K±184K | 4519K±475K | 1253K±190K | 1834K±294K | 4680K±422K | 6510K±613K | 13070K±320K |
